# Supplementary material
Source: Springer Nature journal article supplement (https://www.springermedizin.de/resource/supplementary/12891_2010_888_MOESM3_ESM.pdf/9506636)
Supplement: MOESM3 [file 9506636]

|          |                                                                       |
|----------|-----------------------------------------------------------------------|
| <b>a</b> | Group education on the health care program, diaries and expectations. |
| <b>b</b> | Group education on osteoarthritis, pain and medication.               |
| <b>a</b> | General exercise program.                                             |
| <b>c</b> | Group education about physical activity.                              |
| <b>d</b> | Group education on activity pacing.                                   |
| <b>b</b> | Recreational activity.                                                |
| <b>c</b> | Group based monitoring of personal goals.                             |
| <b>e</b> | Group education on food consumption.                                  |
| <b>d</b> | Specific exercise program, based upon the PSK-scores.                 |
| <b>f</b> | Group education on acceptance and helplessness.                       |
| <b>e</b> | Evaluation and setting goals for the future.                          |
| <b>f</b> | Monitoring of personal goals via telephone by specialized nurse.      |
